# Supplementary material for: Design of Co1Al3(OH)m/carbon nitride hybrid nanostructures for enhanced capacitive energy storage in an alkaline electrolyte
Source: Royal Society of Chemistry journal article supplement (doi:10.1039/d1ma00665g), 2021-01-01
Supplement: d1ma00665g1.pdf [file d1ma00665g1.pdf]

*Supporting information*

Design of  $\text{Co}_1\text{Al}_3(\text{OH})_m$ /Carbon Nitride hybrid  
Nanostructure for Enhanced Capacitive Energy  
Storage in Alkaline Electrolyte

Prajnashree Panda, Ranjit Mishra, Sonali Panigrahy, Sudip Barman\*

School of Chemical Sciences, National Institute of Science Education and Research (NISER), HBNI, Bhubaneswar, PO

Bhimpur-Padanpur, Via Jatni, District Khurda, Orissa - 752050, India.

E-mail: sbarman@niser.ac.in. Tel: +91(674)2494183.

## **Characterizations:**

The x-ray diffraction data (p-XRD) of as prepared samples were conducted by Bucker DAVINCI D8 ADVANCE diffractometer equipped with a monochromatic radiation source of  $\text{Cu } \alpha$  ( $\lambda = 0.15406$ ). The composition and morphology of the material was recorded by Field-emission scanning electron microscope (FESEM) system (Carl Zeiss, Germany make, Model:  $\Sigma$ igma) and Transmission Electron Microscopy (TEM, JEOL F200) and High-Resolution TEM (HRTEM). VG Microtech was used to record the XPS data with monochromatic  $\text{Mg } K_{\alpha}$  X-ray as the source. IR data was collected by using Perkin Elmer RXI FT-IR spectrophotometer. All electrochemical measurements were performed by using CorrTest Electrochemical Workstation [Model: CS350]. Quantachrome Instruments (AutosorbIQ-XR-XR (2 Stat.)) Viton was used to determine the Specific surface area by  $\text{N}_2$  adsorption-desorption isotherm. ICP-OES data was collected on iCAP 7000 Series (Thermo Scientific). Before experiment, pH of the working solution was measured by Hanna (HI 2209) pH meter.

## **Electrochemical measurements:**

Cyclic voltammetry (CV), galvanostatic charging-discharging (GCD) tests and EIS were performed by using Corr Test Electrochemical Workstation [Model: CS350]. EIS measurements were conducted in the frequency range of 0.1 to 100 kHz with 5 mV AC amplitude under open circuit potential. All electrochemical measurements were performed in 2M KOH aqueous solution at room temperature. For half-cell configuration platinum wire, Ag/AgCl and active material coated on  $1 \times 1 \text{ cm}^2$  Ni foam were used as counter, reference and working electrode respectively. Cyclic voltammetry curves were recorded in a potential range of 0-0.55V at scan rate ranging from 5-100 mV/sec.

Specific capacitance of the as synthesized material was calculated by using eq<sup>n</sup> (1)[1, 2]

$$C_s = \frac{I\Delta t}{m\Delta V} \quad (1)$$

$$\Delta V \times C_s = \frac{I\Delta t}{m} = Q \quad (1(a))$$

Specific capacitance ( $C_s$ ) can be calculated from the CV curve by using the eq<sup>n</sup> (2)

$$C_s = \frac{\int Idv}{2m\Delta Vv} \quad (2)$$

Where  $C_s$  is the specific capacitance (F/g),  $Q$  is the specific capacitance (mAh/g)  $I$  is the current applied (mA),  $\Delta t$  is the discharge time (sec),  $m$  is the mass of active material (mg),  $\Delta V$  is the operating potential window (V),  $\int Idv$  is the area under the CV curve and  $v$  denotes the scan rate (mV/s).

For Asymmetric supercapacitor (ASC) cell the as prepared material (active material) act as cathode and commercial AC act as anode. The full cell is represented as  $Co_1Al_3(OH)_m/CN_x//AC$ . In order to balance the charge storage the mass ratio of  $Co_1Al_3(OH)_m/CN_x$  and AC was calculated by using eq<sup>n</sup> (3)

$$\frac{m_+}{m_-} = \frac{C_+ \Delta V_+}{C_- \Delta V_-} \quad (3)$$

Where  $m_+$  was the mass (mg),  $C_+$  and  $C_-$  were the specific capacitance of active material and AC respectively,  $\Delta V_+$  and  $\Delta V_-$  is the voltage window of cathode and anode electrode respectively and  $m_-$  was the mass of anode.

$$E = \frac{Cs(\Delta V)^2}{7.2} \quad (4)$$

$$P = \frac{E}{\Delta t} \times 3600 \quad (5)$$

Where  $\Delta V$  is the voltage window (V),  $C_s$  is the capacitance of ASC (F/g) and  $\Delta t$  is the discharge time (sec)

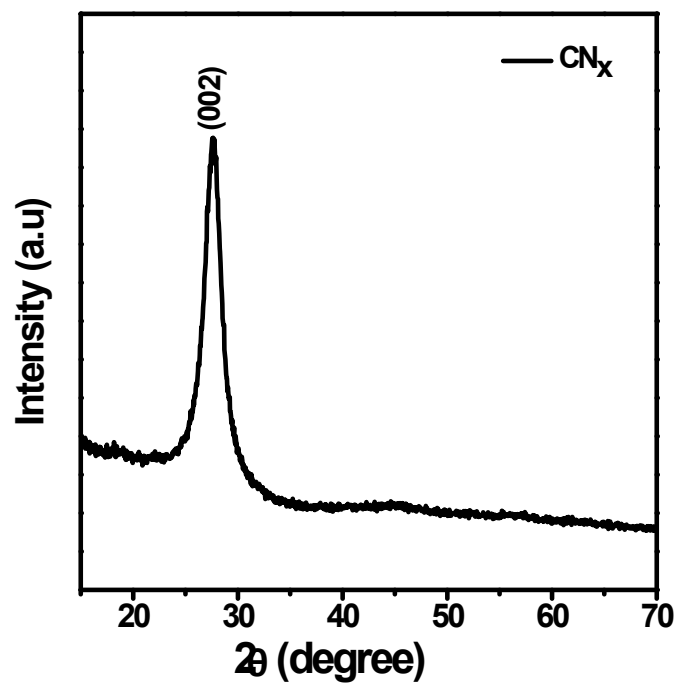

Figure S1. p-XRD pattern of CN<sub>x</sub>

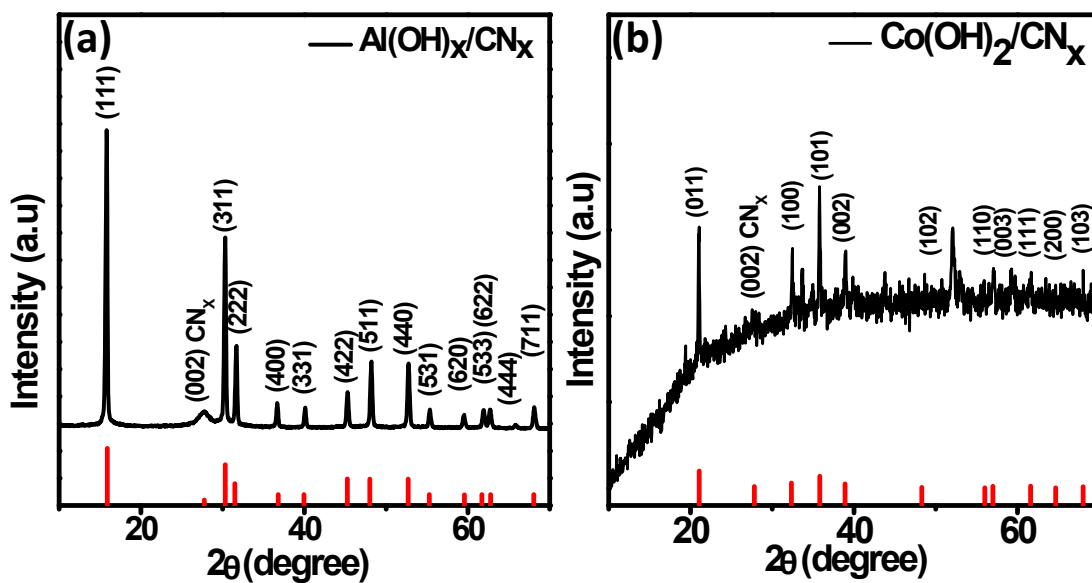

Figure S2. p-XRD pattern of (a)  $\text{Al(OH)}_x/\text{CN}_x$  and (b)  $\text{Co(OH)}_2/\text{CN}_x$  respectively

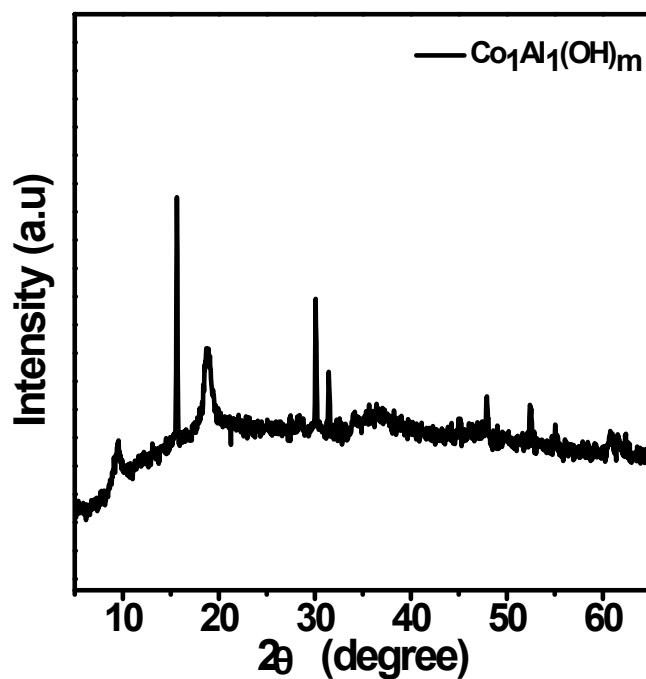

Figure S3. p-XRD pattern of  $\text{Co}_1\text{Al}_3(\text{OH})_m$

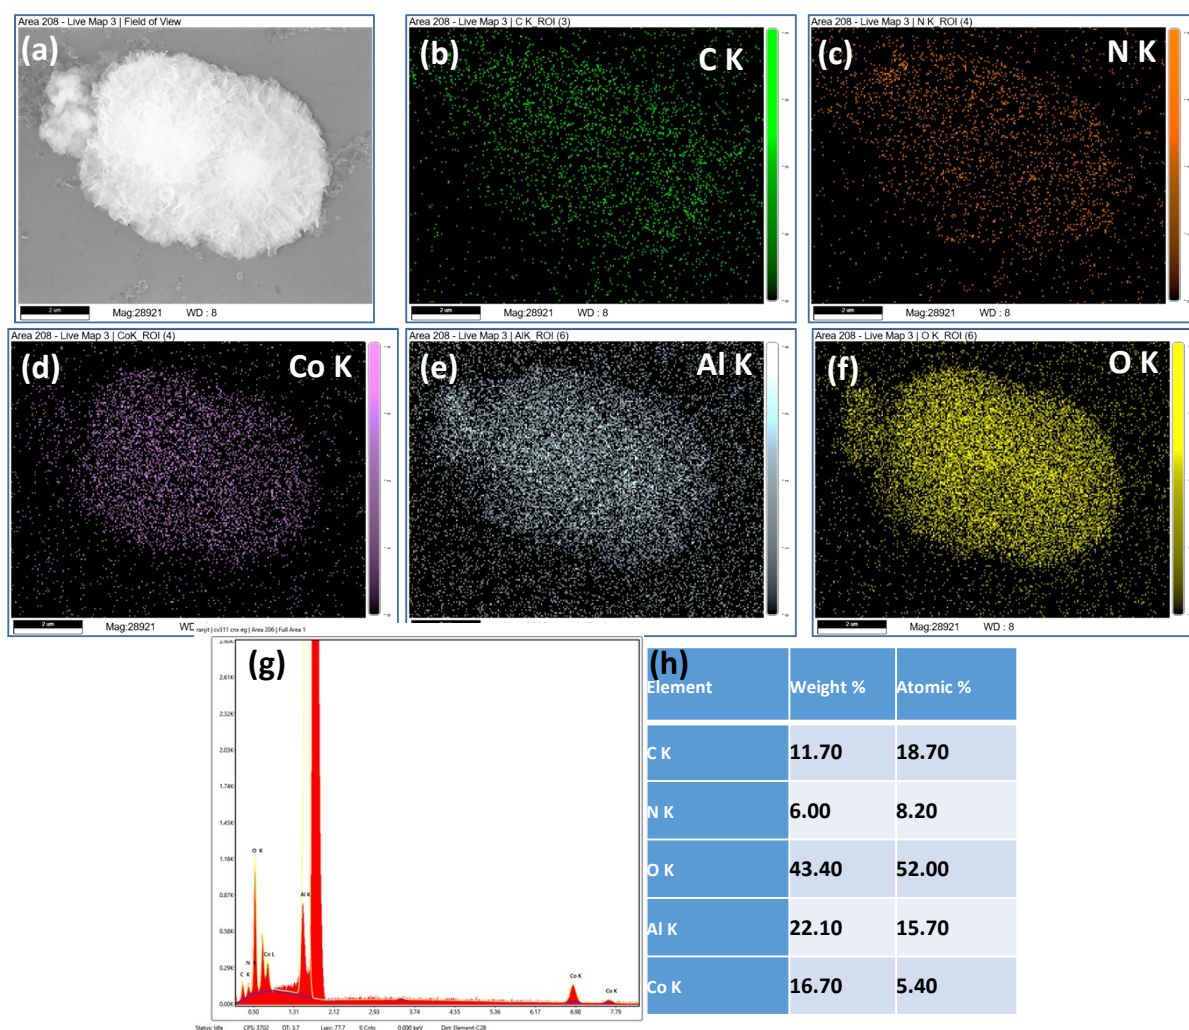

**Figure S4.**(a) SEM image and corresponding Elemental mapping of elements (b) C (c) N (d) Co (e) Al (f) O of  $\text{Co}_1\text{Al}_3(\text{OH})_m/\text{CN}_x$  showing an uniform distribution of C, N, Co, Al and O (g) FESEM EDS profile and (h) weight percentage and atomic percentage of different elements.

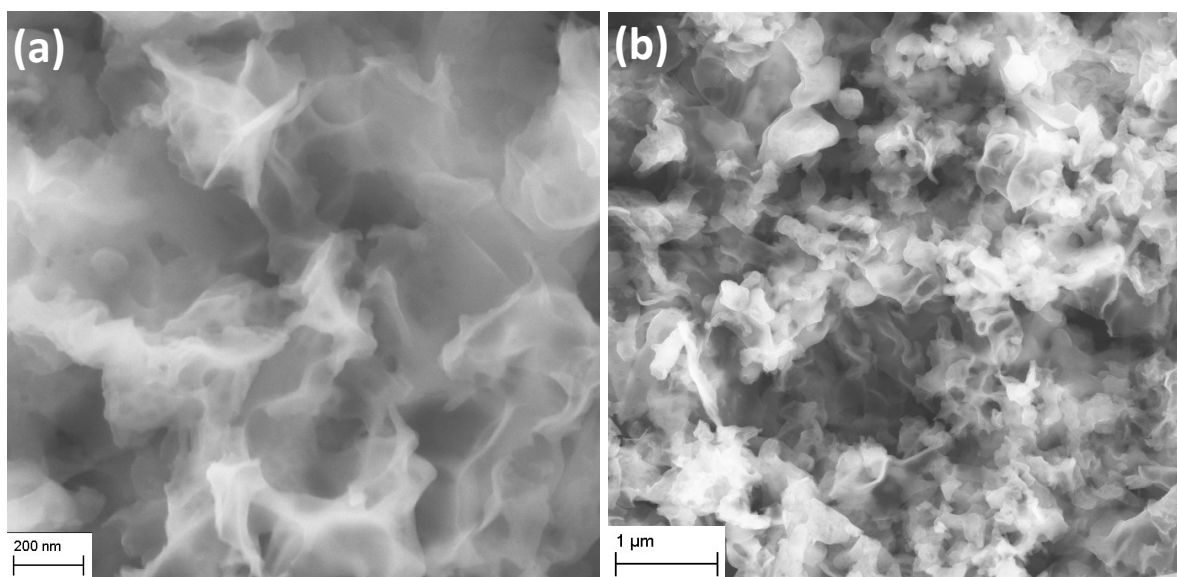

Figure S5. SEM image of  $CN_x$

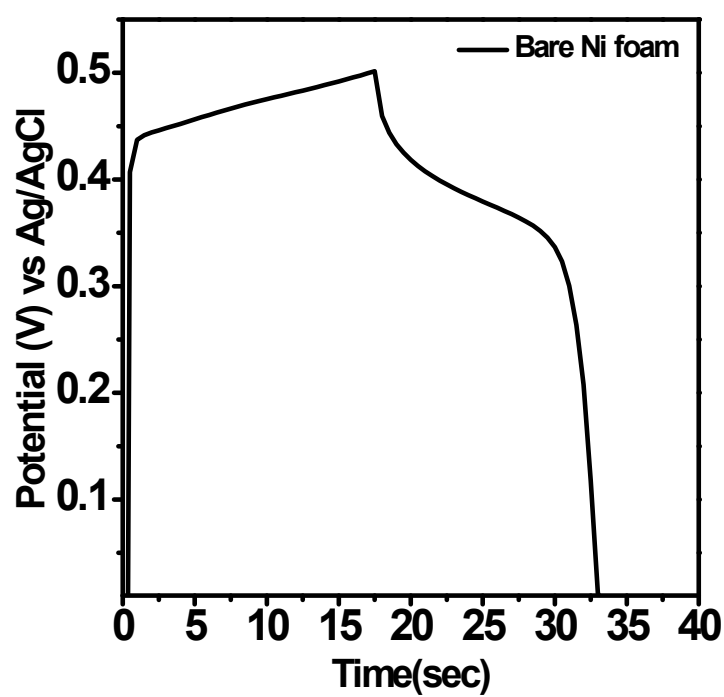

Figure S6. GCD curves of bare Ni foam at 1 A/g current density

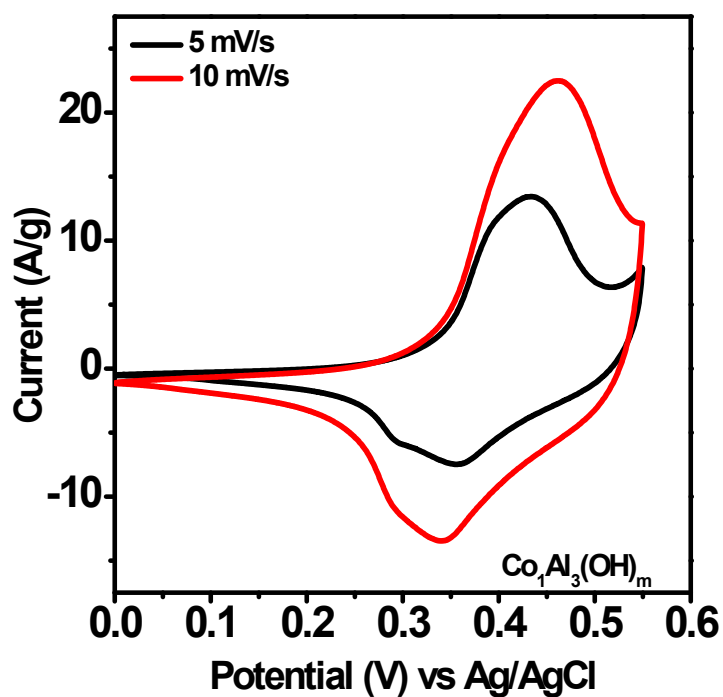

Figure S7. CV curves of  $\text{Co}_1\text{Al}_3(\text{OH})_m$  at diff. scan rate

Table S1. Composition analysis of the  $\text{Co}_1\text{Al}_\delta(\text{OH})_m/\text{CN}_x$  ( $\delta=1, 2, 3, 4$ ) composites from elemental mapping

| Composite                                         | Amount of Co and Al<br>(Atomic %) (EDS) |      |
|---------------------------------------------------|-----------------------------------------|------|
|                                                   | Co                                      | Al   |
| $\text{Co}_1\text{Al}_1(\text{OH})_m/\text{CN}_x$ | 4.3                                     | 3.6  |
| $\text{Co}_1\text{Al}_2(\text{OH})_m/\text{CN}_x$ | 2.4                                     | 4.6  |
| $\text{Co}_1\text{Al}_3(\text{OH})_m/\text{CN}_x$ | 5.4                                     | 15.7 |
| $\text{Co}_1\text{Al}_4(\text{OH})_m/\text{CN}_x$ | 3.9                                     | 16.5 |



**Table S2.** Relative percentage of area and atomic ratio of  $\text{Co}^{+2}/\text{Co}^{+3}$  in  $\text{Co } 2p_{3/2}$  and  $2p_{1/2}$  of  $\text{Co}_1\text{Al}_3(\text{OH})_m/\text{CN}_x$  composite

| Peak                  | Relative area (%) of $\text{Co}^{+2}$ | Relative area (%) of $\text{Co}^{+3}$ | $\text{Co}^{+2}/\text{Co}^{+3}$ |
|-----------------------|---------------------------------------|---------------------------------------|---------------------------------|
| $\text{Co } 2p_{3/2}$ | 679.5                                 | 349.4                                 | 1.95                            |
| $\text{Co } 2p_{1/2}$ | 365                                   | 189.5                                 | 1.93                            |

**Table S3.** Comparison of electrochemical performance of  $\text{Co}_1\text{Al}_3(\text{OH})_m/\text{CN}_x$  composite with previously reported literatures

| Electrode material                                                                | Specific capacitance of single Electrode | Capacitance retention after cycling stability | No. of cycles | Ref.      |
|-----------------------------------------------------------------------------------|------------------------------------------|-----------------------------------------------|---------------|-----------|
| CoAl-LDH/GF                                                                       | 101.4 F/g (0.5 A/g)                      | -                                             | -             | [3]       |
| Co-Al LDH/GHA                                                                     | 640 F/g (1 A/g)                          | 97                                            | 10000         | [4]       |
| Co-Al LDH/rGO-3                                                                   | 1492 F/g (1 A/g)                         | 94.3                                          | 5000          | [5]       |
| g- $\text{C}_3\text{N}_4$ nanosheet@CoAl-LDH                                      | 343.3 F/g (5 A/g)                        | 95.28                                         | 6000          | [6]       |
| CoAl LDHs-0.5                                                                     | 799.2 F/g (1 A/g)                        | 82                                            | 5000          | [7]       |
| $\text{Co}_2\text{Al}(\text{OH})_{7-2x}(\text{CO}_3)_x \cdot n\text{H}_2\text{O}$ | 900 F/g (1 A/g)                          | 100                                           | 1000          | [8]       |
| CoAl-S8                                                                           | 1150.6 F/g (1 A/g)                       | 97.8                                          | 1000          | [9]       |
| CAN-LDH-NS-rGO                                                                    | 1296 F/g (1 A/g)                         | 90.5                                          | 1000          | [10]      |
| Co-Al LDH-NS/GO                                                                   | 1031 F/g (1 A/g)                         | 100                                           | 6000          | [11]      |
| CoAl LDH@PEDOT                                                                    | 672 F/g (1 A/g)                          | 63.1                                          | 5000          | [12]      |
| CoS-20                                                                            | 365 F/g (10 A/g)                         | 91.2                                          | 1300          | [13]      |
| $\text{Co}_3\text{O}_4/\text{CoO}$                                                | 362.8 F/g (0.2 A/g)                      | 78.7                                          | 1000          | [14]      |
| NiFRS                                                                             | 198 C/g (1 A/g)                          | 46                                            | -             | [15]      |
| FeSC1                                                                             | 683.2 C/g (1 A/g)                        | -                                             | -             | [16]      |
| $\text{Co}_1\text{Al}_3(\text{OH})_m/\text{CN}_x$                                 | 1000 F/g (1 A/g)                         | 84.46                                         | 4500          | This work |

## References

- [1] X. Zhai, J. Gao, X. Xu, W. Hong, H. Wang, F. Wu, Y. Liu, *Journal of Power Sources* 396 (2018) 648-658.
- [2] K. Wang, B. Lv, Z. Wang, H. Wu, J. Xu, Q. Zhang, *Dalton Transactions* 49 (2020) 411-417.
- [3] T.M. Masikhwa, M.J. Madito, D.Y. Momodu, J.K. Dangbegnon, O. Guellati, A. Harat, M. Guerioune, F. Barzegar, N. Manyala, *RSC Advances* 6 (2016) 46723-46732.
- [4] A. Zhang, C. Wang, Q. Xu, H. Liu, Y. Wang, Y. Xia, *RSC Advances* 5 (2015) 26017-26026.
- [5] J. Li, P. Zhang, X. Zhao, L. Chen, J. Shen, M. Li, B. Ji, L. Song, Y. Wu, D. Liu, *Journal of Colloid and Interface Science* 549 (2019) 236-245.
- [6] S. Sanati, Z. Rezvani, *Chemical Engineering Journal* 362 (2019) 743-757.
- [7] G. Wang, Z. Jin, *Journal of Materials Chemistry C* 9 (2021) 620-632.
- [8] A.A. Lobinsky, V.P. Tolstoy, L.B. Gulina, *Applied Surface Science* 320 (2014) 609-613.
- [9] Y.-W. Long, H.-Y. Zeng, H.-B. Li, K.-M. Zou, S. Xu, X.-J. Cao, *Electrochimica Acta* 361 (2020) 137098.
- [10] Z. Huang, S. Wang, J. Wang, Y. Yu, J. Wen, R. Li, *Electrochimica Acta* 152 (2015) 117-125.
- [11] L. Wang, D. Wang, X.Y. Dong, Z.J. Zhang, X.F. Pei, X.J. Chen, B. Chen, J. Jin, *Chemical Communications* 47 (2011) 3556-3558.
- [12] J. Han, Y. Dou, J. Zhao, M. Wei, D.G. Evans, X. Duan, *Small* 9 (2013) 98-106.
- [13] J. Li, D. Chen, Q. Wu, *Journal of Energy Storage* 23 (2019) 511-514.
- [14] J. Deng, L. Kang, G. Bai, Y. Li, P. Li, X. Liu, Y. Yang, F. Gao, W. Liang, *Electrochimica Acta* 132 (2014) 127-135.
- [15] K. Wang, Q. Li, Z. Ren, C. Li, Y. Chu, Z. Wang, M. Zhang, H. Wu, Q. Zhang, *Small* 16 (2020) 2001987.
- [16] K. Wang, S. Wang, J. Liu, Y. Guo, F. Mao, H. Wu, Q. Zhang, *ACS Applied Materials & Interfaces* 13 (2021) 15315-15323.
